# Supplementary material
Source: PubMed Central journal article supplement (PMC5749429)
Supplement: NIHMS861964-supplement.pdf [file NIHMS861964-supplement.pdf]

nicotine, we performed a separate set of analyses on FRUs and FLUs of nicotine ( $n=83$  and  $n=12$ , respectively) and found evidence to suggest that effects of nicotine were not appreciably influencing the cocaine findings. Specifically, a whole-brain analysis in FRUs of nicotine found only one significant cluster – in the occipital lobe – where there was a positive correlation between volume and abstinence duration. Thus, it does not appear that the positive correlations between volume and abstinence duration in the subcortical and prefrontal regions found in FRUs of cocaine can be attributed to abstinence from nicotine. Furthermore, a whole-brain analysis comparing volume between FRUs and FLUs of nicotine did not find any significant differences. Thus, it does not appear that former abuse of nicotine would have influenced volumetric differences between FRUs and FLUs of cocaine in this sample.





**Table S3.** Whole-Brain Group-by-abstinence Duration Interaction Analyses: Regions Where the Positive Correlation Between Volume and Abstinence Duration Was Stronger in FRUs than FLUs

|                        | <b>Region at Peak Coordinates</b> | <b>Other Regions in Cluster</b>                                                                                                                                     | <b>Peak Coordinates</b> | <b>Cluster Size</b> |
|------------------------|-----------------------------------|---------------------------------------------------------------------------------------------------------------------------------------------------------------------|-------------------------|---------------------|
| <b><u>Cocaine</u></b>  | R Putamen                         | R Amygdala<br>R Hippocampus<br>R Globus Pallidus<br>R Accumbens<br>R Caudate<br>R Parahippocampal Gyrus<br>R Insula<br>R Subcallosal Cortex<br>L Subcallosal Cortex | (27, 2, -10)            | 2792                |
|                        | <b>Region at Peak Coordinates</b> | <b>Other Regions in Cluster</b>                                                                                                                                     | <b>Peak Coordinates</b> | <b>Cluster Size</b> |
| <b><u>Cannabis</u></b> | R Anterior Insula                 | R Putamen<br>R Globus Pallidus<br>R Inferior Frontal Gyrus<br>R Precentral Gyrus<br>R Posterior Orbitofrontal Cortex                                                | (28, 27, 14)            | 3000                |



**Table S4:** Whole-Brain Analyses Using "Slimmed" ModelsAlcohol*Regions of decreased volume in Former Regular Users compared to Former Light Users*

| <b>Region at Peak Coordinates</b> | <b>Other Regions in Cluster</b> | <b>Peak Coordinates</b> | <b>Cluster Size</b> |
|-----------------------------------|---------------------------------|-------------------------|---------------------|
| Cerebellum                        | L Lingual Gyrus                 | (2, -50, -10)           | 790                 |
| R Precuneus                       | R Posterior Cingulate Cortex    | (8, -54, 22)            | 894                 |

*Positive associations between volume and abstinence time within Former Regular Users*

| <b>Region at Peak Coordinates</b> | <b>Other Regions in Cluster</b>                    | <b>Peak Coordinates</b> | <b>Cluster Size</b> |
|-----------------------------------|----------------------------------------------------|-------------------------|---------------------|
| R Inferior Temporal Gyrus         | R Middle Temporal Gyrus                            | (50, -36, -12)          | 940                 |
| R Hippocampus                     | R Parahippocampal Gyrus<br>R Amygdala<br>R Putamen | (33, -20, -9)           | 1263                |

Cocaine*Regions of decreased volume in Former Regular Users compared to Former Light Users*

No suprathreshold clusters.

*Positive associations between volume and abstinence time within Former Regular Users*

No suprathreshold clusters.

Cannabis*Regions of decreased volume in Former Regular Users compared to Former Light Users*

No suprathreshold clusters.

*Positive associations between volume and abstinence time within Former Regular Users*

| <b>Region at Peak Coordinates</b> | <b>Other Regions in Cluster</b>            | <b>Peak Coordinates</b> | <b>Cluster Size</b> |
|-----------------------------------|--------------------------------------------|-------------------------|---------------------|
| L Central Opercular Cortex        | L Insula<br>L Putamen<br>L Globus Pallidus | (-34, 3, 21)            | 1240                |

**Table S5.** Positive Associations Between Volume and Abstinence Duration in All Former Regular Users (whole-brain analysis)

|                        | <b>Region at Peak Coordinates</b> | <b>Other Regions in Cluster</b>                      | <b>Peak Coordinates</b> | <b>Cluster Size</b> |
|------------------------|-----------------------------------|------------------------------------------------------|-------------------------|---------------------|
| <b><u>All FRUs</u></b> | L Superior Temporal Gyrus         | L Middle Temporal Gyrus<br>L Inferior Temporal Gyrus | (-50, -34, 2)           | 1384                |
|                        | L Putamen                         | L Globus Pallidus<br>L Insula                        | (-33, -4, 8)            | 1151                |

**Table S6.** Clean Sub-Samples: Regions of Less Volume in Former Regular Users Compared to Former Light Users (whole-brain analysis)

|                        | <b>Region at Peak Coordinates</b> | <b>Other Regions in Cluster</b>                                                                                                                                                                                                          | <b>Peak Coordinates</b> | <b>Cluster Size</b> |
|------------------------|-----------------------------------|------------------------------------------------------------------------------------------------------------------------------------------------------------------------------------------------------------------------------------------|-------------------------|---------------------|
| <b><u>Alcohol</u></b>  | L Supramarginal Gyrus             | L Postcentral Gyrus<br>L Superior Temporal Gyrus                                                                                                                                                                                         | (-58, -48, 28)          | 765                 |
|                        |                                   |                                                                                                                                                                                                                                          |                         |                     |
| <b><u>Cannabis</u></b> | <b>Region at Peak Coordinates</b> | <b>Other Regions in Cluster</b>                                                                                                                                                                                                          | <b>Peak Coordinates</b> | <b>Cluster Size</b> |
|                        | R Medial Orbitofrontal Cortex     | L Medial Orbitofrontal Cortex<br>L Paracingulate Gyrus<br>R Subcallosal Cortex<br>L Subcallosal Cortex<br>R Lateral Orbitofrontal Cortex<br>L Lateral Orbitofrontal Cortex<br>R Anterior Cingulate Cortex<br>L Anterior Cingulate Cortex | (18, 34, -20)           | 3585                |

**Table S7.** Clean Sub-Samples: Positive Associations Between Volume and Abstinence Duration Within Former Regular Users (whole-brain analysis)

| <b><u>Alcohol</u></b>  | <b>Region at Peak Coordinates</b> | <b>Other Regions in Cluster</b> | <b>Peak Coordinates</b> | <b>Cluster Size</b> |
|------------------------|-----------------------------------|---------------------------------|-------------------------|---------------------|
|                        | R Thalamus                        | R Globus Pallidus<br>R Putamen  | (4, -2, 6)              | 779                 |
| <b><u>Cannabis</u></b> | <b>Region at Peak Coordinates</b> | <b>Other Regions in Cluster</b> | <b>Peak Coordinates</b> | <b>Cluster Size</b> |
|                        | L Putamen                         | L Insular Cortex                | (-30, 4, -9)            | 295*                |

\*Does not meet cluster threshold

**Figure S1. Clean Sub-samples**

- Less volume in Former Regular Users compared to Former Light Users
- Positive correlation between volume and abstinence duration within Former Regular Users

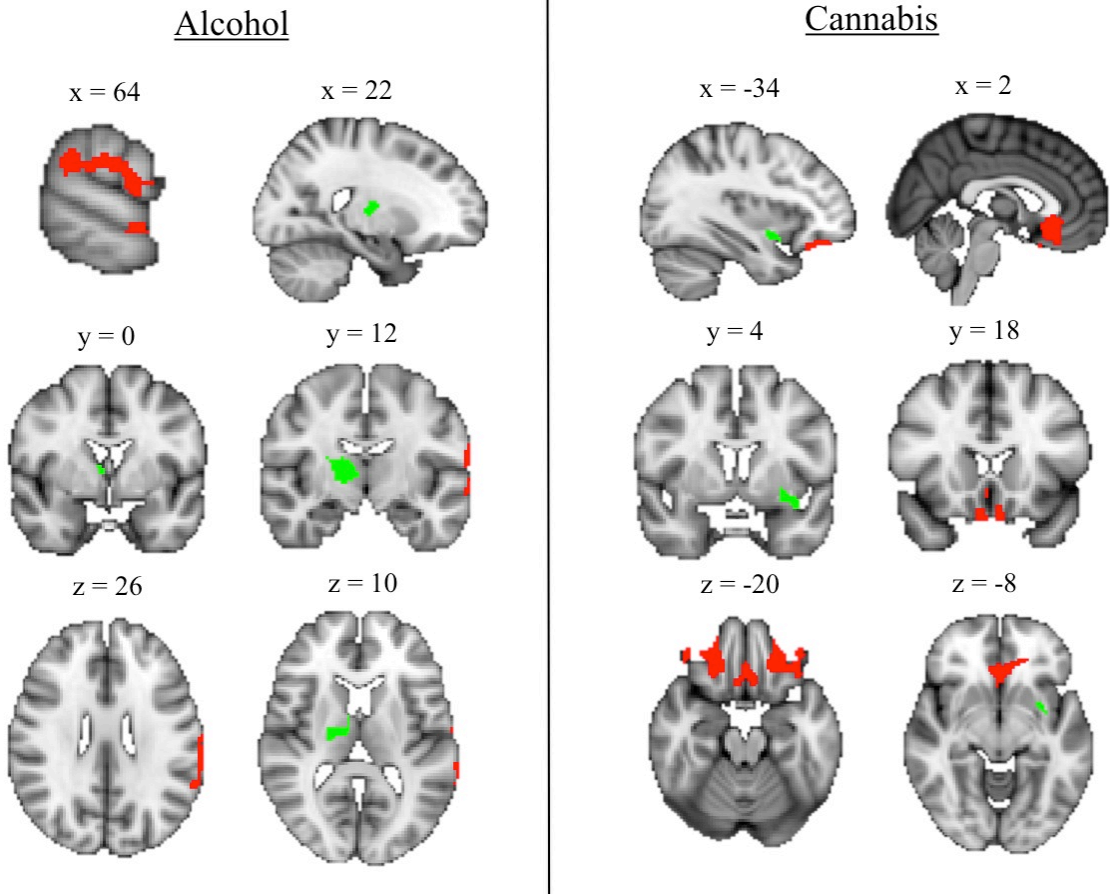

### **Supplementary References**

1. Hare RD. *The Hare psychopathy checklist-revised (2nd ed.)*. Toronto: Multi-Health Systems; 2003.
2. Harpur T, Hare R, Hakstian A. Two-factor conceptualization of psychopathy: Construct validity and assessment implications. *Psychological Assessment: A Journal of consulting and clinical Psychology*. 1989;1(1).
